# Supplementary material for: Machine Learning to Predict the Progression of Bone Mass Loss Associated with Personal Characteristics and a Metabolic Syndrome Scoring Index
Source: MDPI journal article supplement (doi:10.3390/healthcare9080948), 2021-07-28
Supplement: s1 [file s1]

**Table S1.** Additional model predictions of osteopenia using non-concurrent features using the other algorithms.

|             | Gradient boost |             | Decision tree |             | GAN          |             | Naïve Bayes  |             | ANN          |             |
|-------------|----------------|-------------|---------------|-------------|--------------|-------------|--------------|-------------|--------------|-------------|
|             | Second stage   | Third stage | Second stage  | Third stage | Second stage | Third stage | Second stage | Third stage | Second stage | Third stage |
| Sensitivity | 0.693          | 0.754       | 0.721         | 0.724       | 0.770        | 0.750       | 0.713        | 0.629       | 0.672        | 0.675       |
| Specificity | 0.664          | 0.638       | 0.582         | 0.636       | 0.525        | 0.539       | 0.607        | 0.664       | 0.657        | 0.648       |
| Accuracy    | 0.678          | 0.696       | 0.641         | 0.681       | 0.641        | 0.621       | 0.651        | 0.633       | 0.680        | 0.679       |
| ROC         | 0.691          | 0.719       | 0.705         | 0.694       | 0.711        | 0.669       | 0.717        | 0.688       | 0.732        | 0.713       |
| F1          | 0.683          | 0.713       | 0.638         | 0.694       | 0.644        | 0.624       | 0.647        | 0.656       | 0.688        | 0.692       |

Note: Model predictions were performed via SAS Viya package; GAN: generative adversarial network; ANN: artificial neural network; ROC: receiver operating characteristic curve; Non-concurrence indicates the prediction using the individual features from the first stage (2006–2008).

**Table S2.** Additional model predictions of osteopenia using non-concurrent features selected by gradient boosting approach.

|             | Logistic regression |             | XGBoost      |             | Random forest |             | SVM          |             |
|-------------|---------------------|-------------|--------------|-------------|---------------|-------------|--------------|-------------|
|             | Second stage        | Third stage | Second stage | Third stage | Second stage  | Third stage | Second stage | Third stage |
| Sensitivity | 0.686               | 0.532       | 0.650        | 0.712       | 0.736         | 0.681       | 0.617        | 0.695       |
| Specificity | 0.632               | 0.748       | 0.700        | 0.657       | 0.625         | 0.645       | 0.682        | 0.593       |
| Accuracy    | 0.658               | 0.628       | 0.675        | 0.684       | 0.680         | 0.634       | 0.650        | 0.644       |
| ROC         | 0.711               | 0.695       | 0.720        | 0.720       | 0.726         | 0.718       | 0.707        | 0.697       |
| F1          | 0.668               | 0.633       | 0.667        | 0.693       | 0.697         | 0.669       | 0.661        | 0.661       |

Note: XGBoost: extreme gradient boosting; SVM: support vector machine; ROC: receiver operating characteristic curve; Non-concurrence indicates the prediction using the individual features from the first stage (2006–2008).

**Table S3.** Additional model predictions of osteopenia using non-concurrent features using synthetic minority over-sampling technique.

|             | Logistic regression |             | XGBoost      |             | Random forest |             | SVM          |             |
|-------------|---------------------|-------------|--------------|-------------|---------------|-------------|--------------|-------------|
|             | Second stage        | Third stage | Second stage | Third stage | Second stage  | Third stage | Second stage | Third stage |
| Sensitivity | 0.668               | 0.751       | 0.926        | 0.903       | 0.935         | 0.896       | 0.830        | 0.812       |
| Specificity | 0.654               | 0.562       | 0.979        | 0.944       | 0.933         | 0.943       | 0.882        | 0.875       |
| Accuracy    | 0.660               | 0.654       | 0.951        | 0.922       | 0.933         | 0.917       | 0.855        | 0.843       |
| ROC         | 0.727               | 0.711       | 0.976        | 0.967       | 0.979         | 0.971       | 0.878        | 0.865       |
| F1          | 0.663               | 0.656       | 0.951        | 0.922       | 0.934         | 0.918       | 0.852        | 0.838       |

Note: XGBoost: extreme gradient boosting; SVM: support vector machine; ROC: receiver operating characteristic curve; Non-concurrence indicates the prediction using the individual features from the first stage (2006–2008).
